# Supplementary material
Source: Royal Society of Chemistry journal article supplement (https://www.rsc.org/suppdata/cc/1999/1383/902337b.doc)
Supplement: Supplementary file 1 [file 902337b.doc]

**Supplementary Data**

Thiazolium-dependent catalytic antibodies produced using a covalent modification strategy

Fujie Tanaka, Richard A. Lerner,* Carlos F. Barbas III*

The Skaggs Institute for Chemical Biology and Department of Molecular Biology, The Scripps Research Institute, 10550 North Torrey Pines Road, La Jolla, CA 92037 (USA)

Fax: (+1) 619-784-2583

E-mail: carlos@scripps.edu

**General Procedure for 1-Acyl-2-Azetidinones 2, 3, 8, 17, and 18.** To a solution of 2-azetizinone (4 mmol) in THF (8 mL) was added *n*-BuLi (1.6 M in hexane, 4 mmol) at -78 oC. After 5 min, the mixture was warmed to 0 oC and acyl chloride (4.1 mmol) was added. After 30 min, the mixture was added to 10% citric acid and extracted with EtOAc. The combined organic layers were washed with saturated aqueous NaHCO3 and brine, dried over MgSO4, filtered, concentrated *in vacuo*, and flash chromatographed (EtOAc/hexane).

**Compound 2.** 64%. 1H NMR (300 MHz, CDCl3):  7.32-7.17 (m, 5H), 3.57 (t, *J* = 5.3 Hz, 2H), 3.08-2.96 (6H). FABMS: m/z 205 (MH+). HR-FABMS: calcd for C12H14O2N (MH+) 204.1025, found 204.1030.

**Compound 3.** 47%. 1H NMR (300 MHz, CDCl3):  7.98-7.95 (m, 2H), 7.60-7.43 (m, 3H), 3.77 (t, *J* = 5.5 Hz, 2H), 3.11 (t, *J* = 5.5 Hz, 2H). FABMS: m/z 176 (MH+). HR-FABMS: calcd for C10H10O2N (MH+) 176.0712, found 176.0708.

**Compound 8.** 63%. 1H NMR (300 MHz, CDCl3):  3.58 (t, *J* = 5.3 Hz, 2H), 3.05 (t, *J* = 5.3 Hz, 2H), 2.36 (s, 3H). FABMS: m/z 136 (MNa+).

**Compound 17.** 62%. 1H NMR (300 MHz, CDCl3):  4.18 (s, 2H), 3.66 (t, *J* = 5.4 Hz, 2H), 3.14 (t, *J* = 5.4 Hz, 2H). FABMS: m/z 192, 194 (MH+).

**Compound 18.** 63%. 1H NMR (300 MHz, CDCl3):  3.63 (t, *J* = 5.4 Hz, 2H), 3.63 (t, *J* = 6.6 Hz, 2H), 3.29 (t, *J* = 6.6 Hz, 2H), 3.09 (t, *J* = 5.4 Hz, 2H). FABMS: m/z 206, 208 (MH+).

**Compound 6.** A mixture of **17** (97.2 mg, 0.506 mmol) and 4-(2-pyridylazo)-*N*,*N*-dimethylaniline (102.0 mg, 0.451 mmol) in CH3CN (1.0 mL) was stirred at 55-60 oC for 18.5 h. After the mixture was cooled to room temperature and concentrated, EtOAc was added to the residue. The resulting solid was collected and washed with EtOAc to give **6** (158.5 mg, 84%). 1H NMR (300 MHz, CD3OD):  8.63 (d, *J* = 6.2 Hz, 1H), 8.46 (dd, *J* = 7.1 Hz, 9.3 Hz, 1H), 8.25 (d, *J* = 9.3 Hz, 1H), 7.96 (d, *J* = 9.6 Hz, 2H), 7.72 (dd, *J* = 6.2 Hz, 7.1 Hz, 1H), 7.09 (d, *J* = 9.6 Hz, 2H), 6.05 (s, 2H), 3.71 (t, *J* = 5.4 Hz, 2H), 3.40 (s, 6H), 3.37 (t, *J* = 5.4 Hz, 2H). FABMS: m/z 338 [(M-Br)+]. HR-FABMS: calcd for C18H20O2N5 [(M-Br)+] 338.1617 found 338.1628.

**Compound 9.** A mixture of **17** (147.3 mg, 0.767 mmol) and thiazole (54.5 µL, 0.768 mmol) in CH3CN (1.0 mL) was stirred at 70-75 oC for 21 h. After the mixture was cooled to room temperature, the solid was collected and washed with CH3CN to give **9** (139.1 mg, 65%). 1H NMR (300 MHz, CD3OD):  10.2 (m, 1H), 8.46 (m, 1H), 8.35 (m, 1H), 5.89 (s, 2H), 3.73 (t, *J* = 5.5 Hz, 2H), 3.29 (t, *J* = 5.5 Hz, 2H). FABMS: m/z 197 [(M-Br)+]. HR-FABMS: calcd for C8H9O2N2S [(M-Br)+] 197.0385 found 197.0390.

**Compound 10.** A mixture of **17** (138.6 mg, 0.722 mmol) and 4-methyl-5-thiazoleethanol (86.4 µL, 0.722 mmol) in CH3CN (1.0 mL) was stirred at 70-75 oC for 16 h. After the mixture was cooled to room temperature, EtOAc was added and removed to wash the residue. The remaining solid was collected and washed with EtOAc to give **10** (141.8 mg, 59%). 1H NMR (300 MHz, CD3OD):  9.95 (s, 1H), 5.80 (s, 2H), 3.87 (t, *J* = 5.5 Hz, 2H), 3.73 (t, *J* = 5.5 Hz, 2H), 3.29 (t, *J* = 5.5 Hz, 2H), 3.18 (t, *J* = 5.5 Hz, 2H), 2.50 (s, 3H). FABMS: m/z 255 [(M-Br)+]. HR-FABMS: calcd for C11H15O3N2S [(M-Br)+] 255.0803 found 255.0806.

**Compound 11.** 44%. 1H NMR (300 MHz, CD3OD):  10.22 (m, 1H), 8.57 (m, 1H), 8.29 (m, 1H), 4.96 (t, *J* = 6.1 Hz, 2H), 3.59 (t, *J* = 5.4 Hz, 2H), 3.48 (t, *J* = 6.1 Hz, 2H), 3.14 (t, *J* = 5.4 Hz, 2H). FABMS: m/z 211 [(M-Br)+]. HR-FABMS: calcd for C9H11O2N2S [(M-Br)+] 211.0541, found 211.0549.

**Compound 12.** 88%. 1H NMR (300 MHz, CD3OD):  10.00 (s, 1H), 4.85 (t, *J* = 6.3 Hz, 2H), 3.85 (t, *J* = 5.6 Hz, 2H), 3.61 (t, *J* = 5.4 Hz, 2H), 3.43 (t, *J* = 6.3 Hz, 2H), 3.15 (t, *J* = 5.6 Hz, 2H), 3.14 (t, *J* = 5.4 Hz, 2H), 2.62 (s, 3H). FABMS: m/z 269 [(M-Br)+]. HR-FABMS: calcd for C12H17O3N2S [(M-Br)+] 269.0960, found 269.0954.

**Compound 13.** 36%. 1H NMR (300 MHz, CD3OD):  9.57 (s, 1H), 9.25 (m, 1H), 9.00 (m, 1H), 8.23 (dd, *J* = 6.2 Hz, 8.0 Hz, 1H), 5.07 (t, *J* = 6.1 Hz, 2H), 3.58 (t, *J* = 6.1 Hz, 2H), 3.58 (t, *J* = 5.4 Hz, 2H), 3.13 (t, *J* = 5.4 Hz, 2H). FABMS: m/z 248 [(M-Br)+]. HR-FABMS: calcd for C12H14O3N3 [(M-Br)+] 248.1035, found 248.1030.

**Compound 14.** 30%. 1H NMR (300 MHz, CD3OD):  9.44 (s, 1H), 9.13-9.07 (m, 2H), 8.33 (m, 1H), 6.00 (s, 2H), 3.74 (t, *J* = 5.4 Hz, 2H), 3.31 (t, *J* = 5.4 Hz, 2H). FABMS: m/z 234 [(M-Br)+]. HR-FABMS: calcd for C11H12O3N3 [(M-Br)+] 234.0879, found 234.0876.

**Modification of Antibody 38C2 and Active Site Titration.** Modification reactions were initiated by adding 10 µL of a 5 mM stock solution of the -lactam in CH3CN or DMSO to 180 µL of antibody 38C2 solution (20-30 µM active site) in PBS (pH 7.4) at 25 oC. This reaction was scaled depending on the number of titrations required. After 15-30 min, 10 µL of a 10 mM stock solution of 2,4-pentanedione in CH3CN was added to 190 µL of the antibody mixture. After 30 min incubation with 2,4-pentanedione, the enaminone absorption was measured at 318 nm. The remaining antibody mixture was kept for 14.5-40 h, aliquots removed and treated with 2,4-pentanedione and the absorption at 318 nm was measured.

**Mass Analysis of the Modified Fab 38C2.** Modification reactions were performed by using 180 µL of Fab 38C2 (papain digested) solution (24.6 µM active site) in PBS (pH 7.4) and 20 µL of a 5 mM stock solution of **2** and **4** in CH3CN, respectively. After 65 h, the modified proteins were purified by Sephadex G-25M (Pharmacia, PD-10) (10 mM sodium phosphate buffer, pH 7.0). Unmodified Fab 38C2 was also applied to Sephadex G-25M (Pharmacia, PD-10) and eluted with the same buffer. The protein fraction was used for the MALDI-TOF mass analysis with Voyager Elite mass spectrometry (PerSeptive Biosystems).

**Large Scale Modification with 9.** A solution of antibody 38C2 (15 mg/mL, 900 µL) in PBS (pH 7.4) was mixed with a solution of **9** (2.8 mg) in CH3CN (50 µL). After 51 h, the modified proteins were purified by Sephadex G-25M (Pharmacia, PD-10) (PBS).

**HPLC Assays of Decarboxylation of 15 and Kinetic Measurements.** Reaction was initiated by adding 10 µL of a stock solution of **15** in DMSO to 90 µL of **9**-modified antibody in PBS (pH 7.4):200 mM bicine (pH 8.5) = 1:1 at 25 oC. The formation of **16** was measured by HPLC with 10 µL injection of the reaction mixture. Analytical HPLC was performed using MICROSORB-MV column eluted with 24% CH3CN/H2O, 0.1% trifluoroacetic acid at flow rate 1.0 mL/min, with detection at 240 nm. The retention time of **16** is 8.4 min. The background reaction was performed in the absence of the modified antibody under the same conditions. The initial velocities were determined from the linear range of the rate. The observed rate was corrected for the uncatalyzed rate of hydrolysis in the absence of the modified antibody. The kinetic parameters, *k*cat and *K*m, were determined by a linear least-squares fitting of the Lineweaver-Burk plots described by the Michaelis-Menten equation. The rate constants, *k*cats, were obtained by dividing by the active site concentration.

Time course of the modification of antibody 38C2 with **2**.

Modification conditions: [antibody 38C2] 29 µM (active site), [**2**] 263 µM, 5% CH3CN/PBS (pH 7.4). Unmodified active site was titrated by the addition of 2,4-pentanedione and by measuring the absorption at 318 nm.

Final conditions: [**2**] 250 µM, [2,4-pentanedione] 500 µM.

Time course of the modification of antibody 38C2 with **3**.

Modification conditions: [antibody 38C2] 20 µM (active site), [**2**] 263 µM, 5% CH3CN/PBS (pH 7.4). Unmodified active site was titrated by the addition of 2,4-pentanedione and by measuring the absorption at 318 nm.

Final conditions: [**3**] 250 µM, [2,4-pentanediof the modification of antibody 38C2 with **3**.

Modification conditions: [antibody 38C2] 20 µM (active site), [**3**] 263 µM, one] 500 µM.

S-V plot of **9**-modified antibody 38C2-catalyzed decarboxylation of **15**.

Conditions: [**9**-modified antibody 38C2] 40 µM (active site) in 10% DMSO/(PBS (pH 7.4):200 mM bicine (pH 8.5) = 1:1) at 25 oC

S-V plot of **9**-modified antibody 33F12-catalyzed decarboxylation of **15**.

Conditions: [**9**-modified antibody 33F12] 40 µM (active site) in 10% DMSO/(PBS (pH 7.4):200 mM bicine (pH 8.5) = 1:1) at 25 oC
